# Supplementary material
Source: Springer Nature journal article supplement (https://www.springermedizin.de/resource/supplementary/13063_2013_1466_MOESM4_ESM.pdf/9620072)
Supplement: MOESM4 [file 9620072]

# ADAPT HER2+/HR+

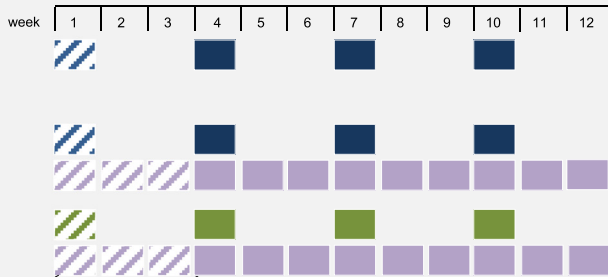

## Endpoint

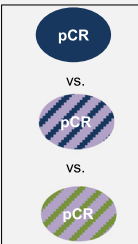

## ADAPT Umbrella

Prognostic estimation      Induction therapy (three weeks)      Efficacy estimation

B I O P S Y

T-DM1 mono  
vs.  
T-DM1 + endocrine therapy  
vs.  
Trastuzumab + endocrine therapy

B I O P S Y

T-DM1  
3,6 mg/kg

Endocrine therapy

Trastuzumab  
Loading 8 mg/kg  
Preservation 6 mg/kg
